# Supplementary material for: Robust Amino-Functionalized Mesoporous Silica Hollow Spheres Templated by CO2 Bubbles
Source: MDPI journal article supplement (doi:10.3390/molecules27010053), 2021-12-22
Supplement: s1 [file s1]

Supplementary Materials

# Robust Amino-Functionalized Mesoporous Silica Hollow Spheres Templated by CO<sub>2</sub> Bubbles

Hongjuan Wang <sup>1,2,†</sup>, Xuefei Liu <sup>1,†</sup>, Olena Saliy <sup>2,3</sup>, Wei Hu <sup>1,2,\*</sup> and Jingui Wang <sup>1,\*</sup>

<sup>1</sup> School of Chemistry and Chemical Engineering, Qilu University of Technology (Shandong Academy of Sciences), Jinan 250353, China; hongjuanwang2015@163.com (H.W.); paowuxian124@163.com (X.L.)

<sup>2</sup> Kyiv College, Qilu University of Technology (Shandong Academy of Sciences), Jinan 250353, China; saliyo@knu.edu.ua

<sup>3</sup> Department of Industrial Pharmacy, Faculty of Chemical and Biopharmaceutical Technologies, Kyiv National University of Technologies and Design, 01011 Kyiv, Ukraine

\* Correspondence: weihu@qlu.edu.cn (W.H.); JGWang@qlu.edu.cn (J.W.)

† These authors contributed equally to this work.

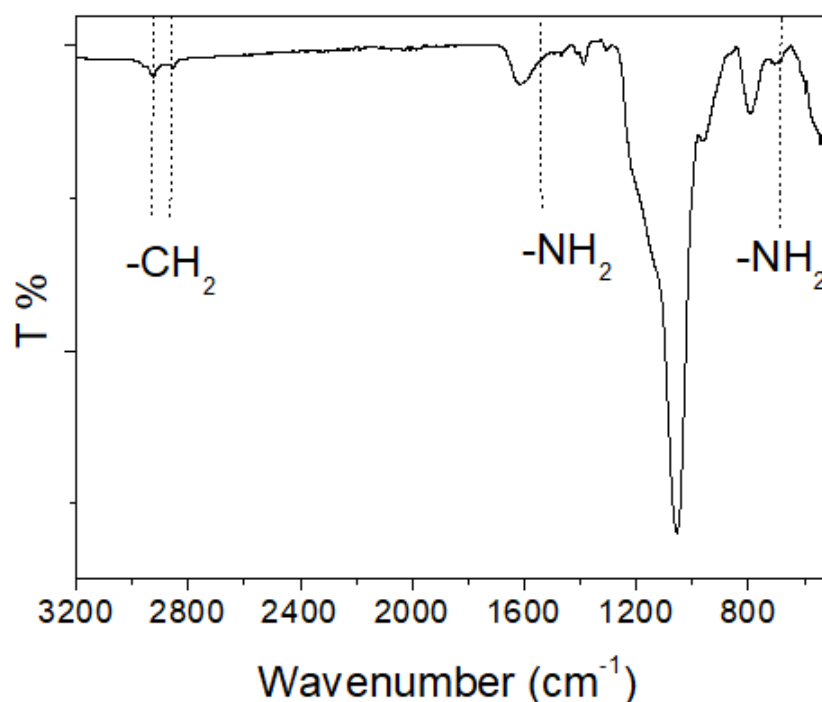

**Figure S1.** FTIR spectra of amino-functionalized mesoporous silica hollow spheres templated by CO<sub>2</sub> bubbles. The absorption bands at about 1550 cm<sup>-1</sup> and 685 cm<sup>-1</sup> were corresponding to the vibration of amine. The adsorption bands at 2930 cm<sup>-1</sup> and 2858 cm<sup>-1</sup> indicated the C–H stretching vibration.

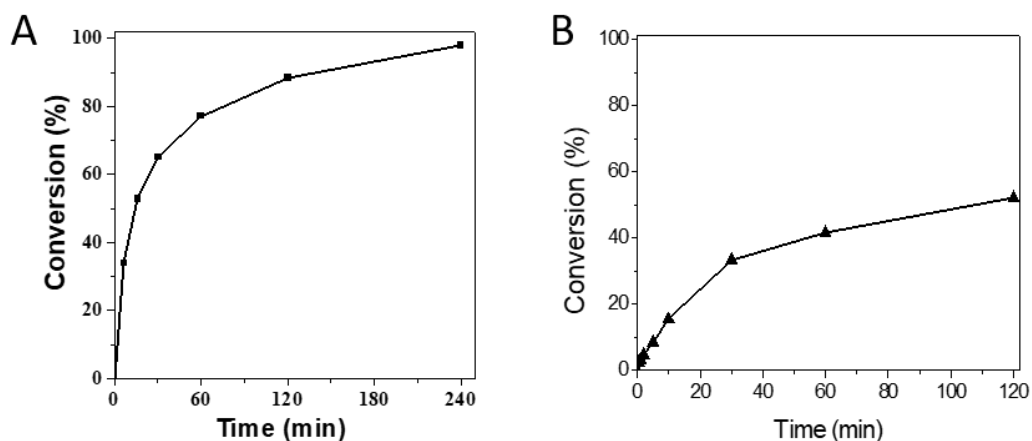

**Figure S2.** Knoevenagel reaction curve of (a) our sample of amino-functionalized mesoporous silica hollow spheres and (b) control sample of traditional amino-functionalized MCM-41 mesoporous silica.

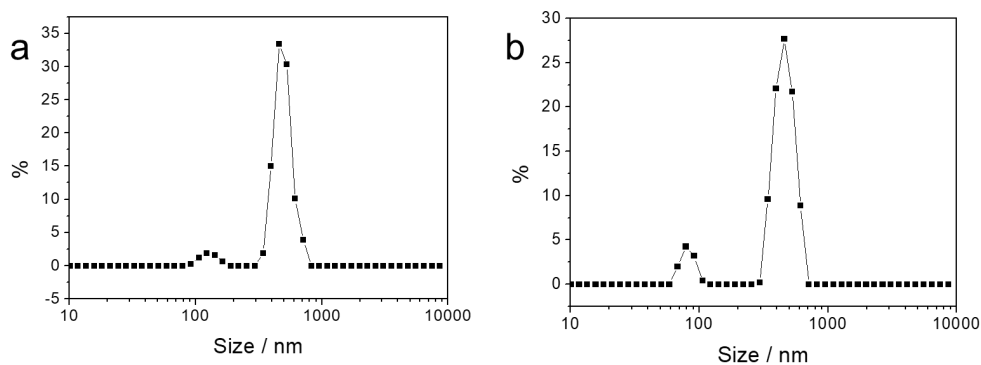

**Figure S3.** Particle size distribution measured by DLS (a) before and (b) after adding metoprolol to the spheres.

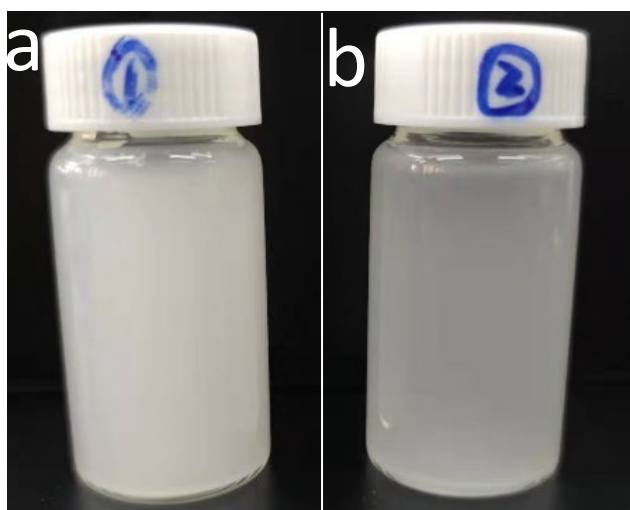

**Figure S4.** Photos of synthesized hollow spheres dispersed in (a) DI water and (b) ethanol.
